# Supplementary material
Source: PubMed Central journal article supplement (PMC3953058)
Supplement: supp_blood-2013-06-507962_blood-2013-06-507962-1.pdf [file supp_blood-2013-06-507962_blood-2013-06-507962-1.pdf]

## Supplemental Methods

*Patients.* Diagnosis of myelodysplastic syndrome (MDS) and acute myeloid leukemia (AML) is based on morphological criteria described by the FAB committee. Aplastic anemia (AA) is defined as hypoplastic marrow with two of the following: neutrophil count  $<1.5 \times 10^9/l$ , platelet count  $<100 \times 10^9/l$ , and hemoglobin level  $<10g/dl$ . Severe AA (SAA) is defined as hypoplastic marrow with two of the following: neutrophil count  $<0.5 \times 10^9/l$ , platelet count  $<20 \times 10^9/l$ , and reticulocyte count  $<20 \times 10^9/l$ . The onset of BMF was defined as the time when one of the following laboratory parameter values used in the International Fanconi Anemia Registry study<sup>1</sup> was observed: a platelet count  $<100 \times 10^9/L$ , a hemoglobin level  $< 10 g/dl$ , or an absolute neutrophil count  $<1 \times 10^9/L$ <sup>1</sup>.

*PCR, sequencing, and Taqman PCR.* Genomic DNA or total RNA was isolated from either PHA-stimulated lymphocytes or cultured fibroblasts using Puregene (Qiagen) or RNAeasy (Qiagen) kits, respectively. cDNA was synthesized with a Primescript II cDNA synthesis kit (Life Technologies). Mutation analyses of cDNA and genomic DNA samples regarding *FANCA*, *FANCC*, or *FANCG* were carried out by PCR and direct sequencing as previously described<sup>2</sup>. In addition, 45 patients were examined by the Multiplex Ligation-mediated Probe Amplification (MLPA) test for *FANCA* (Falco Biosystems). Additional patients (n=29) were screened by whole exome sequencing for mutations in the known 16 FA genes as described below. The *ALDH2* genotype was determined by a previously established Taqman-PCR assay<sup>3</sup>.

*Whole exome sequencing.* For exome sequencing, genomic DNA from each patient was enriched for protein-coding sequences with a SureSelect Human All Exon V4 or V5 kit

(Agilent Technologies, Santa Clara, CA, USA). This was followed by massively parallel sequencing with the HiSeq 2000 platform with 100 bp paired-end reads (Illumina, San Diego, CA, USA). Candidate germline variants were detected through our in-house pipeline for exome-sequencing analysis with minor modifications for the detection of germline variants<sup>4</sup>. The obtained sequences were aligned to the human reference genome (hg19) with the Burrows-Wheeler Aligner (BWA). After removal of duplicate artifacts caused by PCR, the single nucleotide variants with an allele frequency > 0.25 and insertion-deletions with an allele frequency > 0.1 were called. All of the identified variants in the FA genes were verified by PCR and Sanger sequencing.

## References

1. Butturini A, Gale RP, Verlander PC, Adler-Brecher B, Gillio AP, Auerbach AD. Hematologic abnormalities in Fanconi anemia: an International Fanconi Anemia Registry study. *Blood*. 1994;84(5):1650-1655.
2. Tachibana A, Kato T, Ejima Y, et al. The FANCA gene in Japanese Fanconi anemia: reports of eight novel mutations and analysis of sequence variability. *Hum Mutat*. 1999;13(3):237-244.
3. Matsuo K, Wakai K, Hirose K, Ito H, Saito T, Tajima K. Alcohol dehydrogenase 2 His47Arg polymorphism influences drinking habit independently of aldehyde dehydrogenase 2 Glu487Lys polymorphism: analysis of 2,299 Japanese subjects. *Cancer Epidemiol Biomarkers Prev*. 2006;15(5):1009-1013.
4. Kunishima S, Okuno Y, Yoshida K, et al. ACTN1 mutations cause congenital macrothrombocytopenia. *Am J Hum Genet*. 2013;92(3):431-438.
5. Guardiola P, Pasquini R, Dokal I, et al. Outcome of 69 allogeneic stem cell transplantations for Fanconi anemia using HLA-matched unrelated donors: a study on behalf of the European Group for Blood and Marrow Transplantation. *Blood*. 2000;95(2):422-429.

Legend for Supplemental Table 1. Clinical characteristics of the patients studied.

MDS, myelodysplastic syndrome; AML, acute myeloid leukemia; SAA, severe aplastic anemia; AA, non-severe aplastic anemia; SCT, hematopoietic stem cell transplantation; NI, not identified; WES, whole exome sequencing; MLPA, Multiplex Ligation-mediated Probe Amplification method.

<sup>A</sup> These mutations underwent reversion to wild type in lymphocytes.

<sup>B</sup> These mutations were presumptive, since their functional significance has not been determined.

<sup>C</sup> FA-A cases in which nonsense mutations, frame-shifts, or large deletions have been identified in both alleles. Progression of BMF in these cases was analyzed and presented in Figure 1C.

<sup>D</sup> This synonymous mutation is predicted to likely disturb normal splicing by Mutation Taster (<http://www.mutationtaster.org>).

<sup>E</sup> Physical abnormalities included skin abnormalities (hyperpigmentation and *café au lait* spots), low birth weight, growth defects (short stature), and malformations (affecting thumb, radius, skeleton, head/face, eyes, ears, kidneys, gastrointestinal tract, urogenital tract and cardiovascular system). The sum of the number of physical abnormalities and the number of anatomical sites involved in malformations is presented.

<sup>F</sup> Extensive malformation was defined as the involvement of at least three sites including at least one deep organ.

<sup>G</sup> Genomic PCR and sequencing confirmed that the exon27 deletion detected by MLPA was caused by the mutation c.2546delC. This mutation probably abolishes the exon 27 signal because one of the MLPA probes set on exon 27 overlaps with FANCA C2546. In cases #43 and #59, we have not yet determined whether the Exon 27 deletion is associated with a c.2546delC mutation or not.

Supplemental Table 1. Clinical characteristics of the patients studied.

| Patient No. | ALDH2 allele | Disease           | Defective FA genes | Allele1                          | Allele2                              | DNA origin      | WES | FANCA-MLPA                           | Onset of BMF(months) | MDS or AML (months) | SCT (months) | The last observation (months) | Number of physical abnormalities <sup>E</sup> | Extensive malformation <sup>F</sup> | % birth weight |
|-------------|--------------|-------------------|--------------------|----------------------------------|--------------------------------------|-----------------|-----|--------------------------------------|----------------------|---------------------|--------------|-------------------------------|-----------------------------------------------|-------------------------------------|----------------|
| 1           | AA           | MDS               | A <sup>C</sup>     | c.2546delC (p.S849FfsX40)        | c.3781_3785delT TCTT (p.P1261LfsX15) | Blood           |     |                                      | 7                    | 7                   | 36           |                               | 3                                             |                                     | 78.9           |
| 2           | AA           | MDS               | A                  | c.2546delC (p.S849FfsX40)        | NI                                   | Blood           |     |                                      | 0                    | 12                  | 13           |                               | 5                                             | Yes                                 | 79.2           |
| 3           | AA           | MDS               | P                  | c.343delA (p.S115AfsX11)         | c.343delA (p.S115AfsX11)             | Blood           | Yes | Normal                               | 0                    | 4                   |              | 6                             | 6                                             | Yes                                 | 73.8           |
| 4           | GA           | SAA               | A                  | c.2546delC (p.S849FfsX40)        | NI                                   | Blood           |     |                                      | 24                   |                     | 58           |                               | 5                                             |                                     | 85.2           |
| 5           | GA           | SAA               | A <sup>C</sup>     | c.2546delC (p.S849FfsX40)        | c.3931-3932delAG (p.S1311X)          | Skin-fibroblast |     | ex27 <sup>G</sup> /-                 | 21                   |                     | 69           |                               | 6                                             | Yes                                 | 61.2           |
| 6           | GA           | SAA               | A                  | c.1023G>C (p.Q341H) <sup>B</sup> | c.1639G>T (p.A547S) <sup>B</sup>     | Skin-fibroblast |     | Normal                               | 24                   |                     | 249          |                               | 3                                             |                                     | 91.2           |
| 7           | GA           | MDS               | A                  | c.4168-2A>G                      | c.2546delC (p.S849FfsX40)            | Skin-fibroblast |     | ex27 <sup>G</sup> /-                 | 28                   | 168                 | 171          |                               | 2                                             |                                     | 69.8           |
| 8           | GA           | SAA/tongue cancer | A <sup>C</sup>     | c.2593delA (p.I879LfsX24)        | ex18-21 del                          | Blood           |     | ex18-21/-                            | 53                   |                     |              | 469                           | 0                                             |                                     | 71.8           |
| 9           | GA           | SAA               | G                  | c.307+1G>C                       | c.307+1G>C                           | Blood           |     |                                      | 38                   |                     | 56           |                               | 3                                             |                                     | 66.5           |
| 10          | GA           | SAA               | A <sup>C</sup>     | c.2546delC (p.S849FfsX40)        | ex3 del                              | Blood           |     | ex27 <sup>G</sup> /ex1-3             | 22                   |                     | 122          |                               | 5                                             | Yes                                 | 76.4           |
| 11          | GA           | SAA               | G                  | c.307+1G>C                       | c.307+1G>C                           | Blood           |     |                                      | 36                   |                     | 90           |                               | 2                                             |                                     | 76.1           |
| 12          | GA           | SAA               | A <sup>C</sup>     | c.2546delC (p.S849FfsX40)        | ex30 del                             | Blood           |     | ex27 <sup>G</sup> /ex30              | 37                   |                     | 74           |                               | 1                                             |                                     | 97.4           |
| 13          | GA           | SAA               | A <sup>C</sup>     | c.2546delC (p.S849FfsX40)        | c.2546delC (p.S849FfsX40)            | BM-fibroblast   |     | ex27 <sup>G</sup> /ex27 <sup>G</sup> | 38                   |                     | 80           |                               | 5                                             |                                     | 78.9           |
| 14          | GA           | MDS               | P                  | c.2629G>A (p.A877T) <sup>B</sup> | NI                                   | Blood           | Yes | Normal                               | 12                   | 108                 | 135          |                               | 2                                             |                                     | 98.2           |
| 15          | GA           | MDS               | G                  | c.1066C>T (p.Q356X)              | c.307+1G>C                           | Blood           | Yes |                                      | 12                   | 61                  | 62           |                               | 5                                             | Yes                                 | 82.9           |
| 16          | GA           | SAA               | I                  | c.158-2A>G                       | c.288G>A (p.E96E) <sup>D</sup>       | Blood           | Yes | Normal                               | 7                    |                     | 45           |                               | 11                                            | Yes                                 | 52.4           |
| 17          | GA           | SAA               | A                  | c.1303C>T (p.R435C)              | c.4168-1G>C                          | Blood           | Yes |                                      | 26                   |                     | 168          |                               | 2                                             |                                     | 53.5           |
| 18          | GA           | MDS               | M                  | c.2330A>G (p.Y777C) <sup>B</sup> | NI                                   | Blood           | Yes | Normal                               | 24                   | 51                  | 51           |                               | 12                                            | Yes                                 | 66.2           |
| 19          | GA           | SAA               | G                  | c.307+1G>C                       | c.307+1G>C                           | Blood           | Yes | Normal                               | 48                   |                     | 88           |                               | 7                                             | Yes                                 | 90.6           |
| 20          | GA           | SAA               | G                  | c.307+1G>C                       | c.307+1G>C                           | Blood           | Yes |                                      | 39                   |                     | 84           |                               | 5                                             |                                     | 100.6          |
| 21          | GA           | SAA               | I                  | c.3346_3347insT (p.S1116FfsX16)  | c.2826+3 A>G <sup>B</sup>            | Blood           | Yes | Normal                               | 15                   |                     | 28           |                               | 9                                             | Yes                                 | 78.6           |
| 22          | GA           | SAA               | A                  | c.2602-2A>T                      | c.4198C>T (p.R1400C)                 | Blood           | Yes | Normal                               | 48                   |                     | 154          |                               | 3                                             |                                     | 94.9           |
| 23          | GA           | SAA               | G                  | c.907_908delCT (p.L303GfsX5)     | c.307+1G>C                           | Blood           | Yes |                                      | 21                   |                     | 78           |                               | 1                                             |                                     | 66.9           |
| 24          | GA           | SAA               | G                  | c.307+1G>C                       | c.307+1G>C                           | Blood           | Yes |                                      | 69                   |                     | 135          |                               | 4                                             | Yes                                 | 74             |

|    |    |                   |                                       |                                  |                                    |                 |     |                                      |     |     |     |   |     |         |
|----|----|-------------------|---------------------------------------|----------------------------------|------------------------------------|-----------------|-----|--------------------------------------|-----|-----|-----|---|-----|---------|
| 25 | GA | SAA               | G                                     | c.307+1G>C                       | c.307+1G>C                         | Blood           | Yes | Normal                               | 18  |     | 72  | 2 |     | 85.8    |
| 26 | GA | MDS               | A                                     | ex 30 del                        | NI                                 | Blood           |     | ex30/-                               | 60  | 192 | 199 | 4 | Yes | 102.1   |
| 27 | GG | SAA               | A                                     | c.2602-2A>T                      | c.2527T>G(p.Y843D)                 | Skin-fibroblast |     | Normal                               | 78  |     | 228 | 3 |     | 83      |
| 28 | GG | SAA               | A <sup>c</sup>                        | c.2546delC (p.S849FfsX40)        | c.2546delC (p.S849FfsX40)          | Blood           |     |                                      | 114 |     | 128 | 3 |     | 87.7    |
| 29 | GG | AML               | A                                     | c.2602-2A>T                      | c.2602-2A>T                        | Blood           |     | Normal                               | 62  | 311 | 316 | 3 |     | 81.5    |
| 30 | GG | AML               | A                                     | c.4124_4125delCA (p.T1375SfsX49) | c.2290C>T (p.R764W)                | Blood           |     | Normal                               | 156 | 156 | 162 | 3 |     | 90.1    |
| 31 | GG | SAA               | G                                     | c.307+1G>C                       | c.1066C>T (p.Q356X)                | Blood           |     |                                      | 50  |     | 52  | 4 |     | 66.2    |
| 32 | GG | MDS               | A reversion(loss of allele2 mutation) | c.2546delC (p.S849FfsX40)        | c.3295C>T <sup>A</sup> (p.Q1099X)  | BM-fibroblast   |     | ex27 <sup>G</sup> /ex33              | 49  | 189 | 192 | 6 | Yes | 72.4    |
| 33 | GG | MDS/tongue cancer | A reversion(loss of allele1 mutation) | c.44_69delA (p.P15RfsX13)        | c.2170A>C (p.T724P)                | BM-fibroblast   |     | Normal                               | 108 | 348 | 384 | 2 |     | 62.4    |
| 34 | GG | AML               | A                                     | c.2602-1G>A                      | NI                                 | Blood           |     |                                      | 108 | 384 | 448 | 3 |     | 82.2    |
| 35 | GG | SAA               | A <sup>c</sup>                        | c.2546delC (p.S849FfsX40)        | ex38 del                           | Blood           |     |                                      | 72  |     | 122 | 1 |     | 92.3    |
| 36 | GG | SAA               | A                                     | ex24-28 skipping                 | NI                                 | Blood           |     |                                      | 60  |     | 144 | 4 |     | 74.8    |
| 37 | GG | AML               | A                                     | c.1470+?_1626+?del               | NI                                 | Blood           |     | ex16-17/-                            | 61  | 61  | 66  | 1 |     | 70.6    |
| 38 | GG | SAA               | A                                     | c.2546delC (p.S849FfsX40)        | c.4168-2A>G                        | Blood           |     | ex27 <sup>G</sup> /-                 | 106 |     | 184 | 2 |     | 70.4    |
| 39 | GG | SAA               | A <sup>c</sup>                        | c.2546delC (p.S849FfsX40)        | c.2546delC (p.S849FfsX40)          | Blood           |     | ex27 <sup>G</sup> /ex27 <sup>G</sup> | 70  |     | 153 | 5 | Yes | 76.6    |
| 40 | GG | SAA               | G                                     | c.307+1G>C                       | c.307+1G>C                         | Blood           |     |                                      | 28  |     | 67  | 0 |     | 84.9    |
| 41 | GG | MDS               | A                                     | c.2546delC (p.S849FfsX40)        | c.1567-1G>A                        | Blood           |     | ex27 <sup>G</sup> /ex32              | 82  | 82  | 108 | 3 |     | 67.9    |
| 42 | GG | SAA               | A <sup>c</sup>                        | c.2546delC (p.S849FfsX40)        | c.3720_3724del (p.E1240DfsX36)     | Blood           |     | ex27 <sup>G</sup> /ex37              | 88  |     | 185 | 2 |     | 98.7    |
| 43 | GG | MDS               | A <sup>c</sup>                        | ex27 del                         | ex1-28 del                         | Blood           | Yes | ex27/ex1-28                          | 72  | 72  | 78  | 1 |     | 84      |
| 44 | GG | SAA               | A                                     | ex30 del                         | NI                                 | Blood           |     | ex30/-                               | 45  |     | 130 | 4 |     | 84      |
| 45 | GG | SAA               | A                                     | ex11-15 duplication              | NI                                 | Blood           |     | ex11-15/-                            | 297 |     | 318 | 2 |     | Unknown |
| 46 | GG | SAA               | A                                     | ex30 del                         | NI                                 | BM-fibroblast   |     | ex30/-                               | 96  |     | 182 | 2 |     | 97      |
| 47 | GG | MDS               | A                                     | c.2870G>A (p.W957X)              | c.2723_2725TCT>GCC (p.LS908_909RP) | Blood           | Yes |                                      | 121 | 335 | 343 | 3 |     | Unknown |
| 48 | GG | MDS               | G                                     | c.1386delC (p.A463GfsX55)        | c.1637-15 G>A <sup>B</sup>         | Blood           | Yes | Normal                               | 69  | 120 | 133 | 2 |     | 88.1    |
| 49 | GG | SAA               | G                                     | c.1066C>T (p.Q356X)              | c.1066C>T (p.Q356X)                | Blood           | Yes | Normal                               | 66  |     | 77  | 4 |     | 70.5    |
| 50 | GG | SAA               | G                                     | c.1066C>T (p.Q356X)              | c.1066C>T (p.Q356X)                | Blood           | Yes | Normal                               | 72  |     | 79  | 1 |     | 68.6    |
| 51 | GG | SAA               | G                                     | c.91C>T (p.Q31RfsX5)             | c.307+1G>C                         | Blood           | Yes |                                      | 27  |     | 109 | 4 |     | 77      |

|    |    |     |                                         |                                     |                                   |       |     |                      |     |     |     |    |     |         |
|----|----|-----|-----------------------------------------|-------------------------------------|-----------------------------------|-------|-----|----------------------|-----|-----|-----|----|-----|---------|
| 52 | GG | SAA | G                                       | c.91C>T<br>(p.Q31RfsX5)             | c.307+1G>C                        | Blood | Yes |                      | 60  | 113 |     | 4  |     | 66.7    |
| 53 | GG | AML | A                                       | c.4240_4241delAG<br>(p.S1414LfsX10) | c.2602-1G>A                       | Blood | Yes | Normal               | 41  | 115 | 128 | 6  | Yes | 67      |
| 54 | GG | SAA | A                                       | c.2602-2A>T                         | c.4198C>T<br>(p.R1400C)           | Blood | Yes | Normal               | 120 |     | 190 | 3  |     | 86.4    |
| 55 | GG | MDS | A <sup>c</sup> (reversion<br>suspected) | c.2546delC<br>(p.S849FfsX40)        | c.3919_3920insT<br>(p.Q1307LfsX6) | Blood | Yes | ex27 <sup>g</sup> /- | 144 | 145 | 208 | 2  |     | 89.4    |
| 56 | GG | AA  | A                                       | c.2602-2A>T                         | c.2602-1G>A                       | Blood | Yes | Normal               | 134 |     | 147 | 2  |     | 67.4    |
| 57 | GG | AA  | A                                       | ex30 del                            | NI                                | Blood |     | ex30/-               | 51  |     | 65  | 3  |     | 89.5    |
| 58 | GG | SAA | A                                       | ex30 del                            | NI                                | Blood |     | ex30/-               | 92  |     | 104 | 3  |     | 81.2    |
| 59 | GG | AML | A <sup>c</sup>                          | ex27 del                            | ex37 skipping                     | Blood |     | ex27/-               | 136 | 176 | 179 | 2  |     | Unknown |
| 60 | GA | SAA | Not detected                            | NI                                  | NI                                | Blood | Yes |                      | 87  |     | 162 | 3  |     | 67.7    |
| 61 | GA | AML | Not detected                            | NI                                  | NI                                | Blood | Yes | Normal               | 41  | 41  | 99  | 3  |     | 84      |
| 62 | GG | SAA | Not detected                            | NI                                  | NI                                | Blood | Yes | Normal               | 58  |     | 72  | 10 | Yes | 57.4    |
| 63 | GG | SAA | Not detected                            | NI                                  | NI                                | Blood | Yes | Normal               | 40  |     | 61  | 6  | Yes | 75.7    |
| 64 | GG | SAA | Not detected                            | NI                                  | NI                                | Blood | Yes | Normal               | 96  |     | 106 | 2  |     | 73.1    |

Legend for Supplemental Table 2. DEB test results of the patients and control subjects.

Achromatic areas less than a chromatid in width were scored as gaps. Exchange configurations, and dicentric and ring chromosomes were scored as rearrangements. Gaps were excluded from the calculation of chromosome aberrations per cell, and rearrangements were scored as 2 breaks.

Supplemental Table 2. DEB test results of the patients and control subjects.

| Patient and control number | Spontaneous breakage rate (breaks/cell) | Spontaneous breakage rate (% aberrant cells) | DEB-induced breakage rate (breaks/cell) | DEB-induced breakage rate (% aberrant cells) |
|----------------------------|-----------------------------------------|----------------------------------------------|-----------------------------------------|----------------------------------------------|
| Patient 1                  | 0.08                                    | 10                                           | 6.45                                    | 95                                           |
| 2                          | 0.08                                    | 6                                            | 0.44                                    | 37                                           |
| 3                          | 0.02                                    | 3                                            | 0.91                                    | 38                                           |
| 4                          | 0.02                                    | 2                                            | 1.21                                    | 48                                           |
| 5                          | 0.04                                    | 10                                           | 1.3                                     | 59                                           |
| 6                          | 0.06                                    | 8                                            | 8.32                                    | 100                                          |
| 7                          | 0                                       | 4                                            | 0.36                                    | 39                                           |
| 8                          | 0.04                                    | 6                                            | 2.28                                    | 38                                           |
| 9                          | 0.02                                    | 2                                            | 0.79                                    | 46                                           |
| 10                         | 0.02                                    | 14                                           | 0.82                                    | 59                                           |
| 11                         | 0.09                                    | 9                                            | 3.16                                    | 72                                           |
| 12                         | 0.02                                    | 2                                            | 2.66                                    | 83                                           |
| 13                         | 0.02                                    | 4                                            | 0.64                                    | 30                                           |
| 14                         | 0.05                                    | 11.5                                         | 0.3                                     | 22.9                                         |
| 15                         | 0.12                                    | 16                                           | 8.54                                    | 100                                          |
| 16                         | 0                                       | 0                                            | 0.52                                    | 17                                           |
| 17                         | 0.06                                    | 8                                            | 0.56                                    | 38                                           |
| 18                         | 0.06                                    | 6                                            | 4.2                                     | 92                                           |
| 19                         | 0.07                                    | 10                                           | 3.49                                    | 92                                           |
| 20                         | 0                                       | 2                                            | 2.36                                    | 68                                           |
| 21                         | 0.04                                    | 7                                            | 0.96                                    | 52.4                                         |
| 22                         | 0.01                                    | 4                                            | 4.07                                    | 99                                           |
| 23                         | 0.08                                    | 14                                           | 6.45                                    | 100                                          |
| 24                         | 0.01                                    | 1                                            | 6.14                                    | 99                                           |
| 25                         | 0                                       | 2                                            | 2.68                                    | 73                                           |



|    |      |     |      |      |
|----|------|-----|------|------|
| 26 | 0    | 3   | 1.17 | 67   |
| 27 | 0.06 | 16  | 0.45 | 43   |
| 28 | 0.08 | 12  | 1.96 | 60   |
| 29 | 0    | 0   | 4.97 | 84   |
| 30 | 0.02 | 4   | 5.16 | 95   |
| 31 | 0.02 | 2   | 4.77 | 97   |
| 32 | 0    | 0   | 0.12 | 9    |
| 33 | 0    | 0   | 0.03 | 2    |
| 34 | 0.04 | 4   | 5.92 | 97.9 |
| 35 | 0    | 0   | 6.15 | 81   |
| 36 | 0.1  | 8   | 9    | 100  |
| 37 | 0.04 | 4   | 7.67 | 99   |
| 38 | 0.02 | 6   | 1.59 | 72   |
| 39 | 0.05 | 6   | 2.06 | 76   |
| 40 | 0.06 | 9   | 1.93 | 73   |
| 41 | 0    | 0   | 1.92 | 70   |
| 42 | 0.02 | 2   | 5.39 | 97   |
| 43 | 0.04 | 6   | 6.38 | 97   |
| 44 | 0    | 2   | 1.72 | 68   |
| 45 | 0.1  | 10  | 6.12 | 97.3 |
| 46 | 0.02 | 6   | 4.92 | 96   |
| 47 | 0.1  | 3   | 4.39 | 90   |
| 48 | 0.01 | 5   | 2.56 | 82   |
| 49 | 0    | 6   | 3.1  | 91   |
| 50 | 0.04 | 4   | 2.54 | 80   |
| 51 | 0.06 | 6   | 0.92 | 54.4 |
| 52 | 0.04 | 6   | 0.93 | 49.5 |
| 53 | 0.02 | 3.2 | 6.3  | 97.3 |
| 54 | 0.01 | 2   | 3.58 | 92   |
| 55 | 0.01 | 1   | 0.01 | 2    |
| 56 | 0.01 | 2   | 1.4  | 57   |

|    |      |    |      |      |
|----|------|----|------|------|
| 57 | 0    | 0  | 4.85 | 93   |
| 58 | 0.01 | 4  | 0.59 | 46   |
| 59 | 0.02 | 8  | 0.67 | 36.9 |
| 60 | 0    | 0  | 0.48 | 28   |
| 61 | 0.01 | 2  | 0.89 | 35   |
| 62 | 0.49 | 52 | 3.8  | 95.7 |
| 63 | 0    | 0  | 7.8  | 100  |
| 64 | 0.09 | 9  | 2.38 | 54   |

---

|         |   |      |   |      |   |
|---------|---|------|---|------|---|
| Control | 1 | 0    | 0 | 0.02 | 2 |
| 2       |   | 0    | 0 | 0.01 | 1 |
| 3       |   | 0    | 0 | 0.01 | 1 |
| 4       |   | 0.01 | 1 | 0.05 | 5 |
| 5       |   | 0.01 | 1 | 0.05 | 5 |
| 6       |   | 0    | 1 | 0.01 | 1 |
| 7       |   | 0    | 2 | 0.04 | 4 |
| 8       |   | 0    | 1 | 0.04 | 4 |
| 9       |   | 0    | 0 | 0.02 | 2 |
| 10      |   | 0    | 0 | 0.03 | 3 |
| 11      |   | 0    | 0 | 0.02 | 3 |
| 12      |   | 0    | 1 | 0    | 2 |
| 13      |   | 0    | 2 | 0.02 | 4 |
| 14      |   | 0    | 0 | 0.02 | 2 |
| 15      |   | 0    | 1 | 0    | 1 |
| 16      |   | 0    | 0 | 0    | 1 |
| 17      |   | 0    | 0 | 0.04 | 4 |

|    |      |   |      |    |
|----|------|---|------|----|
| 18 | 0    | 0 | 0    | 2  |
| 19 | 0    | 1 | 0.05 | 5  |
| 20 | 0    | 0 | 0    | 0  |
| 21 | 0    | 2 | 0.04 | 6  |
| 22 | 0.02 | 2 | 0.04 | 4  |
| 23 | 0    | 0 | 0    | 1  |
| 24 | 0    | 0 | 0.04 | 5  |
| 25 | 0    | 0 | 0    | 4  |
| 26 | 0    | 0 | 0.02 | 3  |
| 27 | 0.02 | 2 | 0    | 1  |
| 28 | 0    | 0 | 0.02 | 4  |
| 29 | 0    | 0 | 0    | 0  |
| 30 | 0    | 0 | 0.03 | 2  |
| 31 | 0    | 0 | 0.07 | 10 |
| 32 | 0.02 | 3 | 0.04 | 5  |

---
